# Supplementary material for: Reliability and Validity of the Athletic Shoulder (ASH) Test Performed Using Portable Isometric-Based Strength Training Device
Source: MDPI journal article supplement (doi:10.3390/biology11040577), 2022-04-11
Supplement: s1 [file s1]

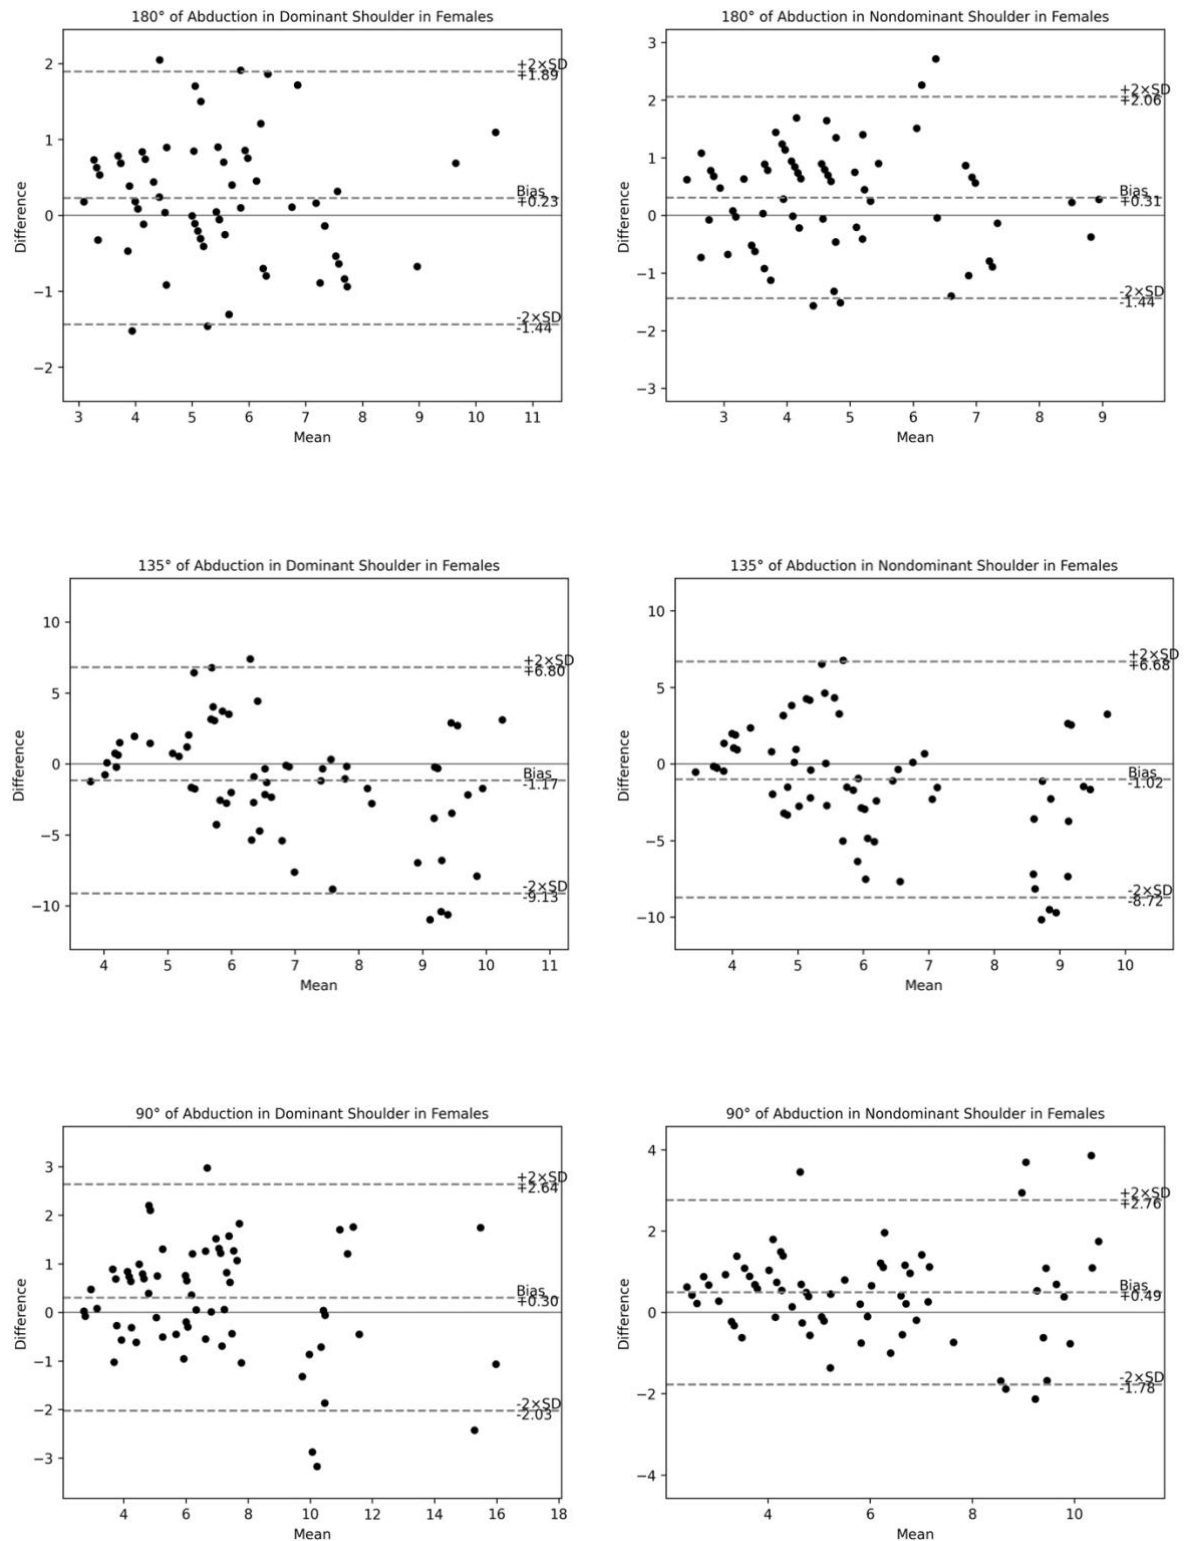

**Figure S1.** Bland-Altman plots comparing the obtained values of force measured during the three sessions by two raters in three different angular positions in dominant and nondominant shoulders using Active5™ and K-Force Plates in females.

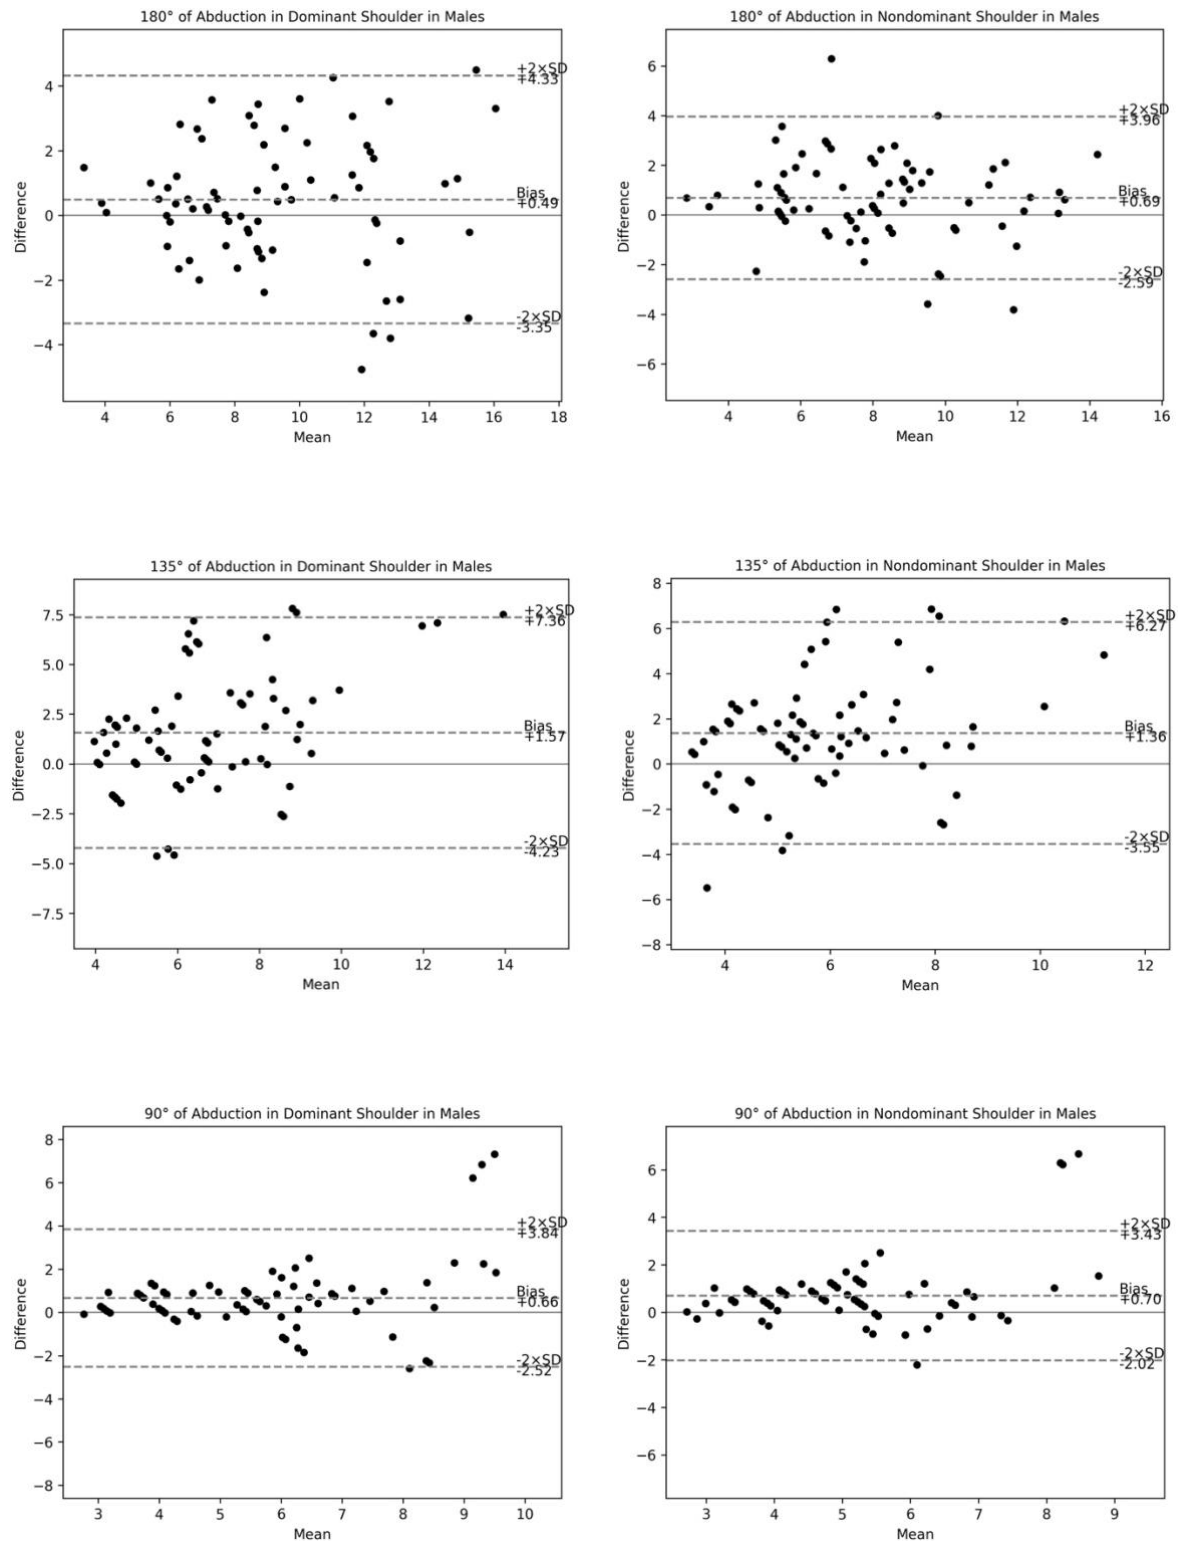

**Figure S2.** Bland-Altman plots comparing the obtained values of force measured during the three sessions by two raters in three different angular positions in dominant and nondominant shoulders using Active5™ and K-Force Plates in males.

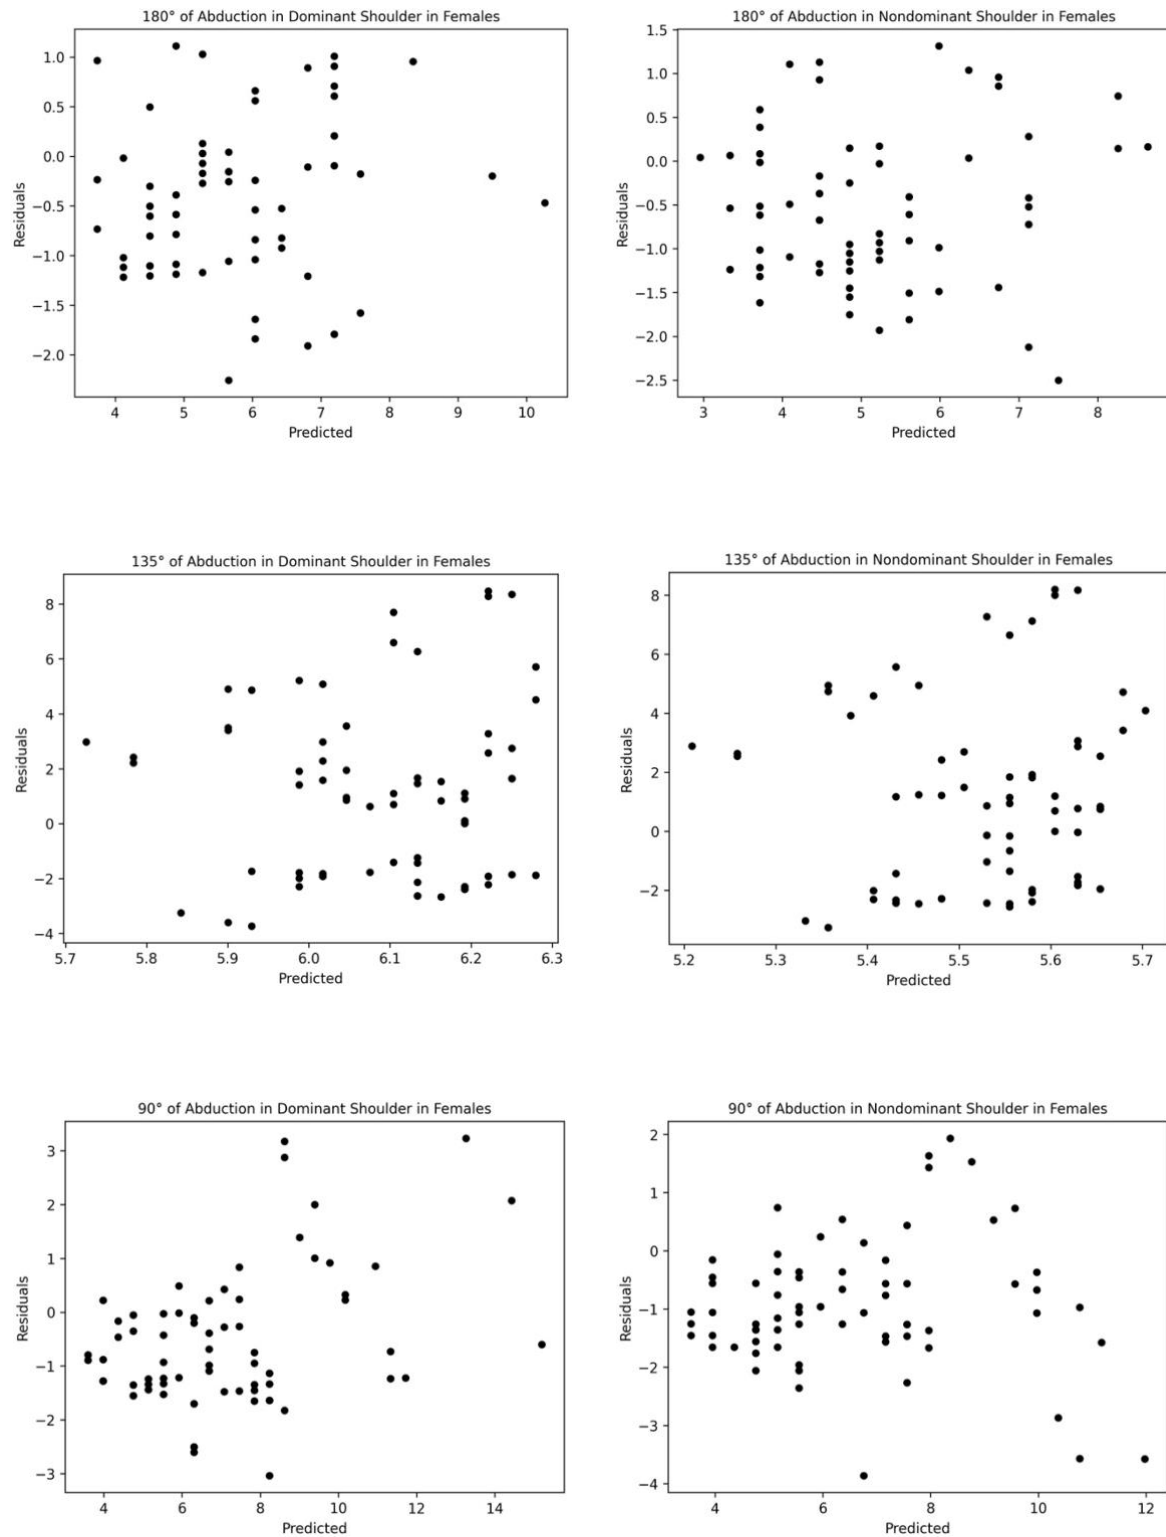

**Figure S3** Plots comparing residuals and predicted values of force measured during the three sessions by two raters in three different angular positions in dominant and nondominant shoulders using Active5™ and K-Force Plates in females.

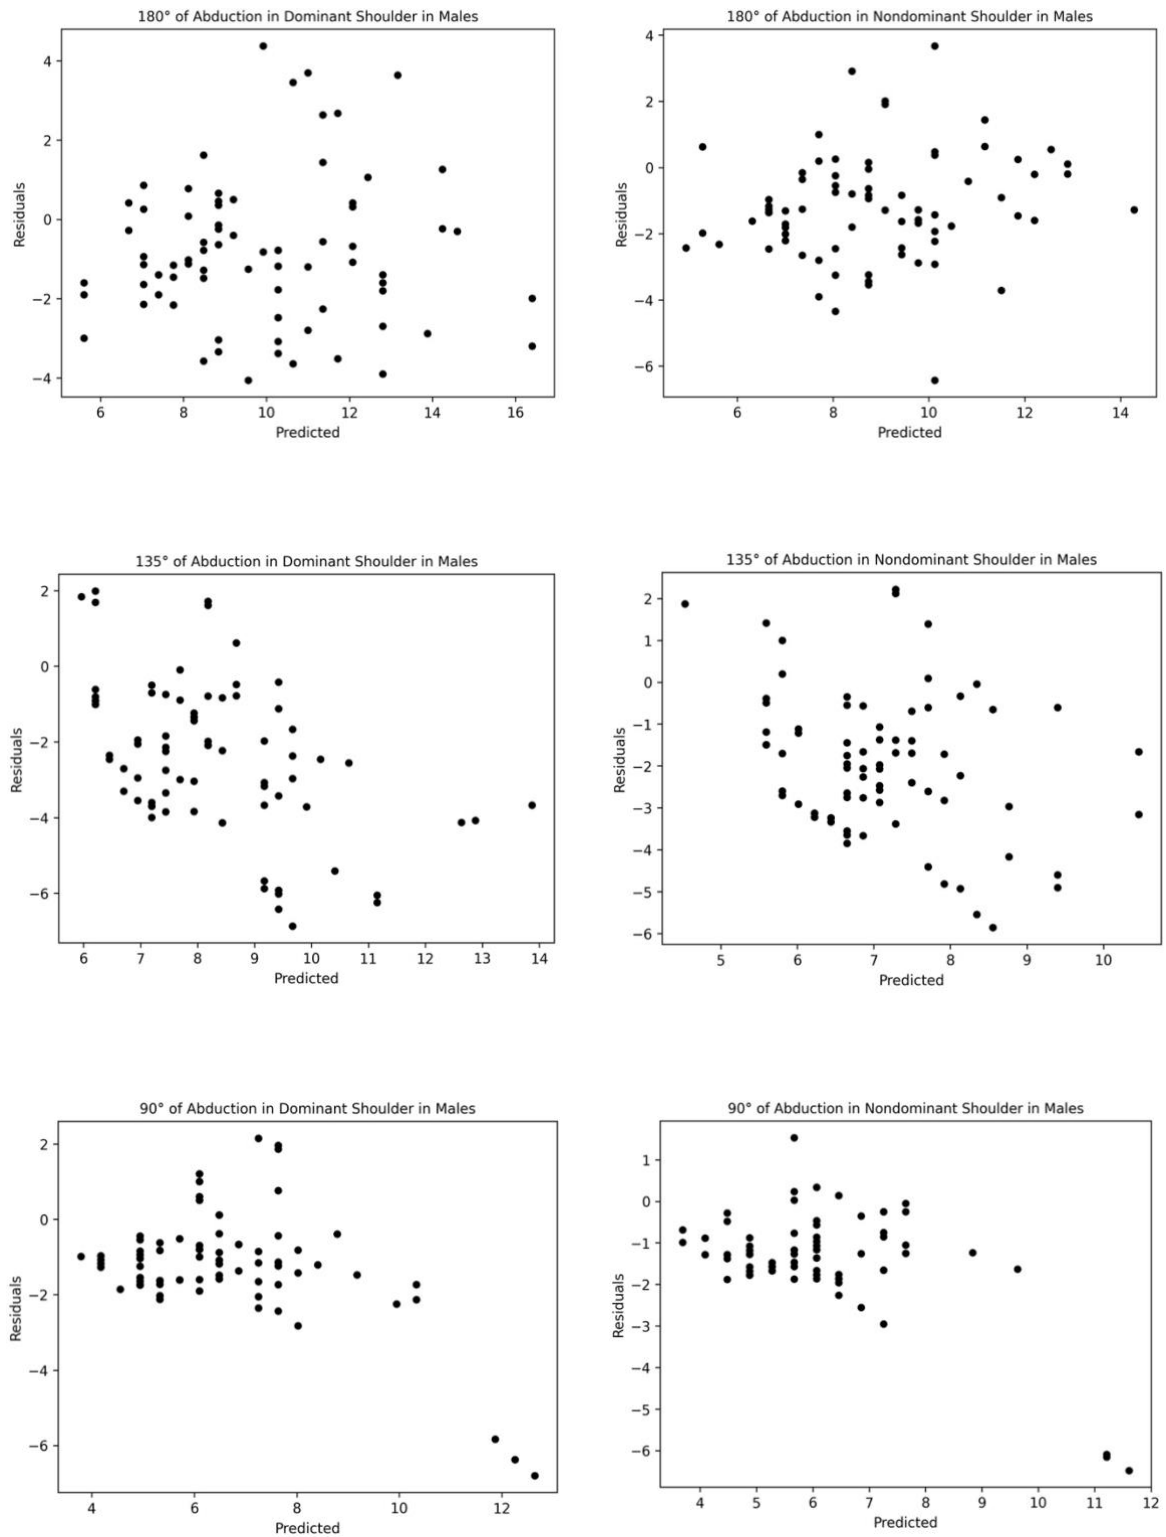

**Figure S4.** Plots comparing residuals and predicted values of force measured during the three sessions by two raters in three different angular positions in dominant and nondominant shoulders using Active5™ and K-Force Plates in males.
